# Supplementary material
Source: publisher site journal article supplement (https://www.dovepress.com/article/601517)
Supplement: Supplementary file 1 [file 601517%20Supplementary%20Figure%201.docx]

**
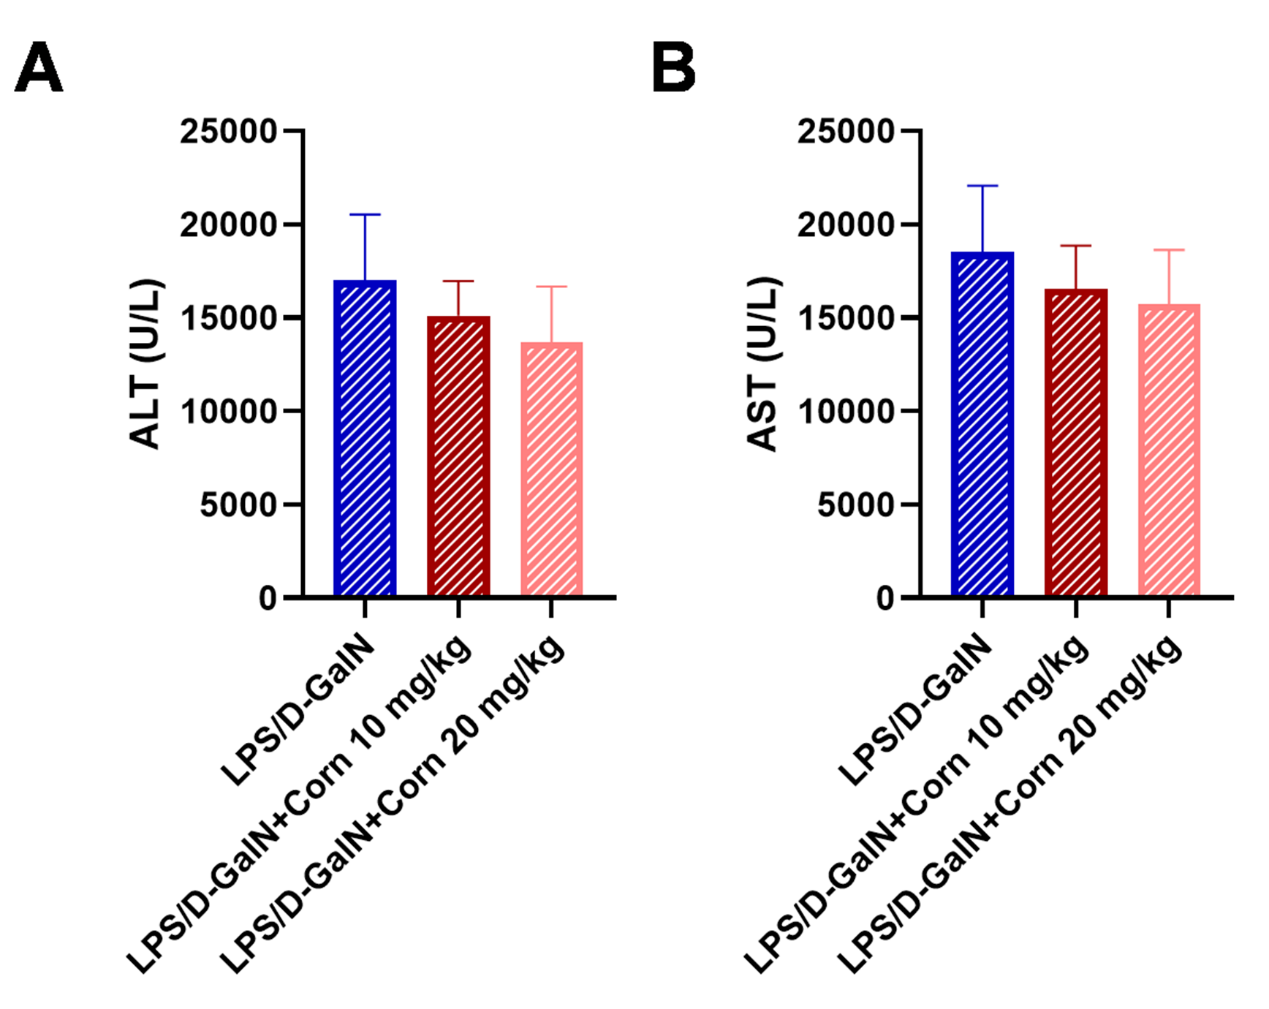
**

**Supplementary Figure 1 Cornuside has no obvious therapeutic effects after ALF induction.** Mice were administered with LPS (10 μg/kg)/D-GalN (250 mg/kg) by an intraperitoneal injection, followed with injection of cornuside (10, 20 mg/kg body weight) via tail vein 1 h later. Serum were collected 12 h after LPS/D-GalN administration. (**A**) Serum alanine aminotransferase (ALT) levels. (**B**) Serum aspartate aminotransferase (AST) levels. Data are presented as the mean ± SEM (n = 5).
